# Supplementary material
Source: ML conference proceedings conference paper supplement (https://aclanthology.org/D17-1112)

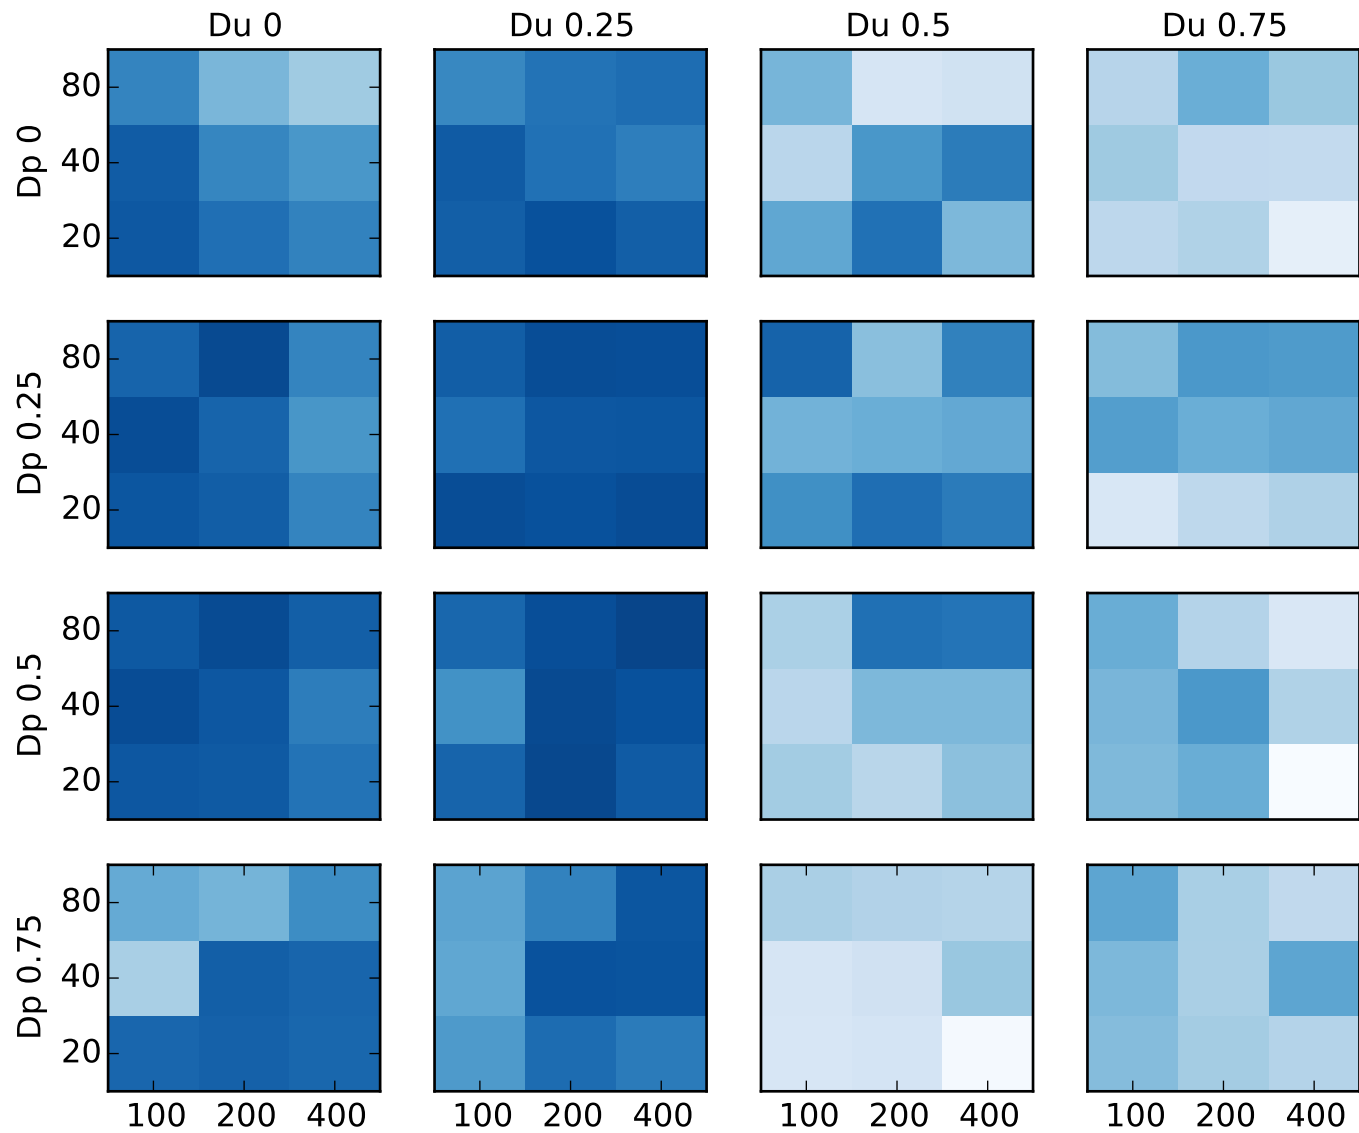

Supplement: Attachment [file D17-1112.Attachment.zip]

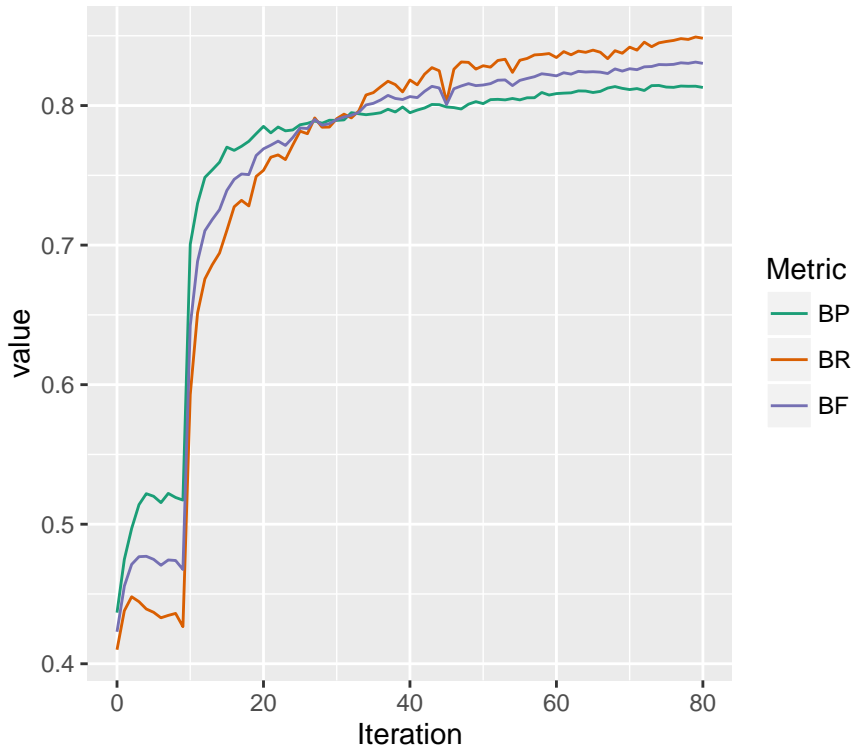

Supplement: Attachment [file D17-1112.Attachment.zip]

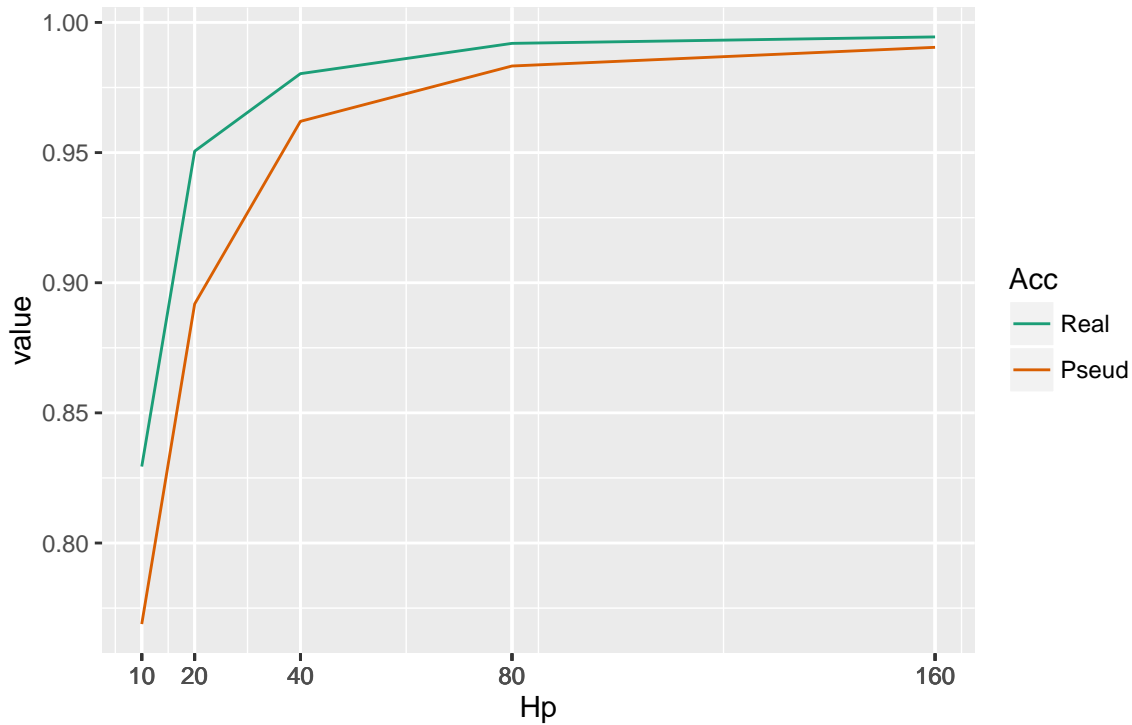

Supplement: Attachment [file D17-1112.Attachment.zip]
